# Supplementary material for: Comparison on Photosynthesis and Antioxidant Defense Systems in Wheat with Different Ploidy Levels and Octoploid Triticale
Source: Int J Mol Sci. 2018 Oct 2;19(10):3006. doi: 10.3390/ijms19103006 (PMC6213355; doi:10.3390/ijms19103006)
Supplement: Supplementary file 1 [file ijms-19-03006-s001.pdf]

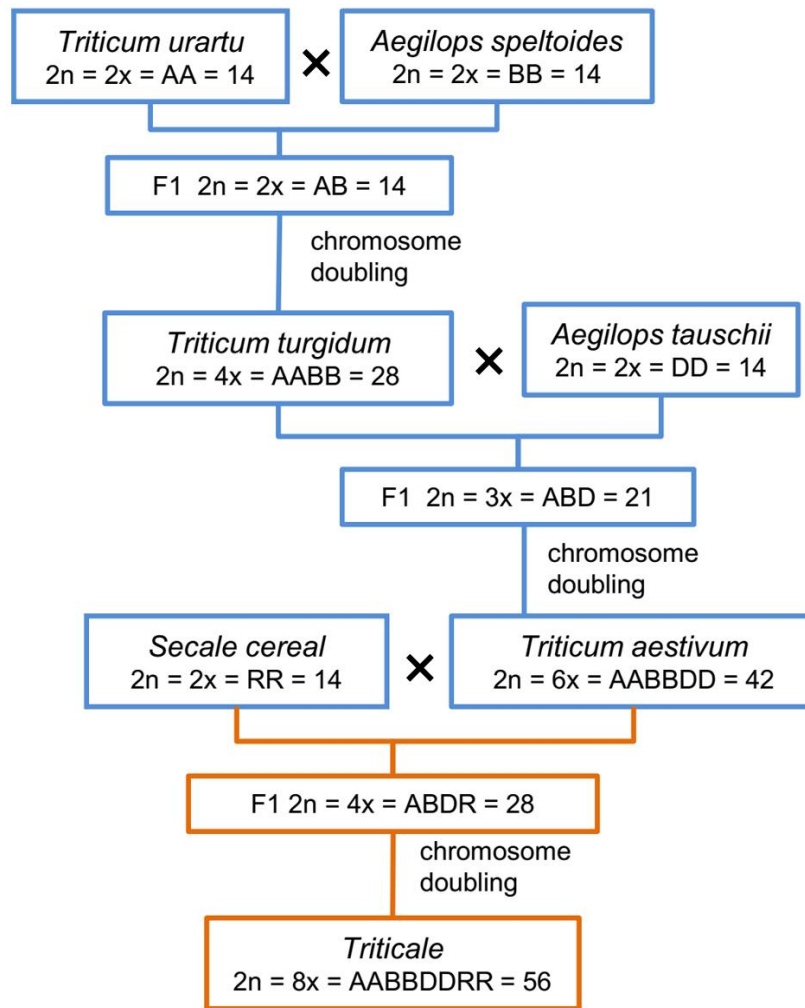

**Figure S1.** Genetic background of wheat with different ploidy levels and octoploid Triticale during the evolutionary process. Blue and orange indicate natural hybridization and man-made crossing, respectively.

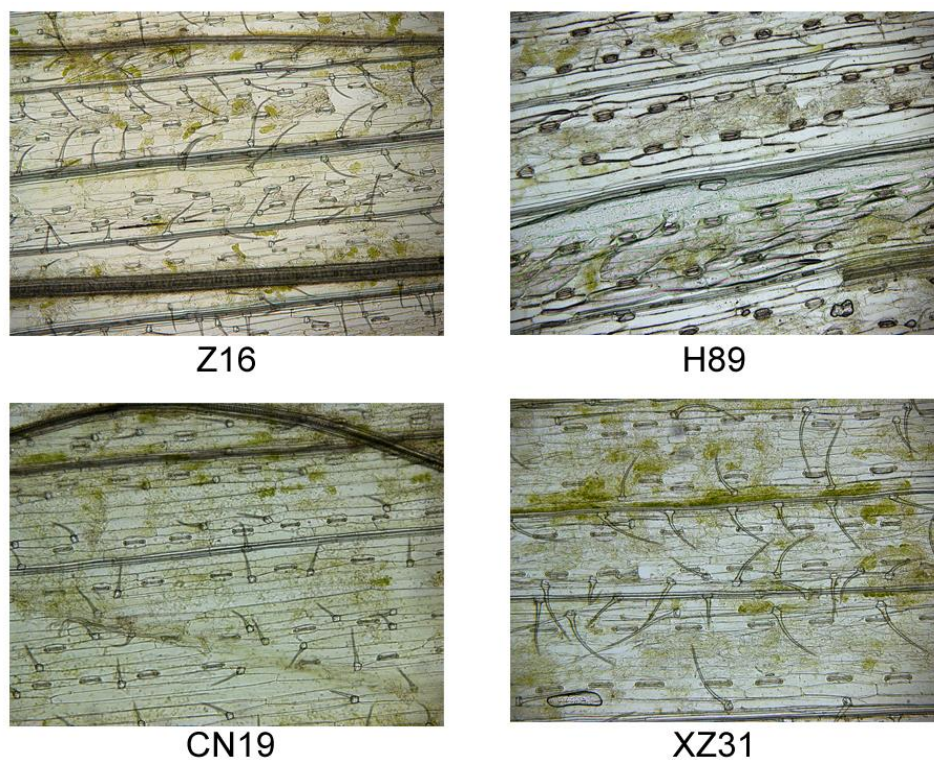

**Figure S2.** Analysis of stomatal characteristics of wheat with different ploidy levels and octoploid Triticale. Z16, accessions of *Triticum monococcum* (W2n); H89, accessions of *Triticum dicoccum* (W4n); CN19, accessions of *Triticum aestivum* (W6n); XZ31, accessions of octaploid Triticale (T8n).

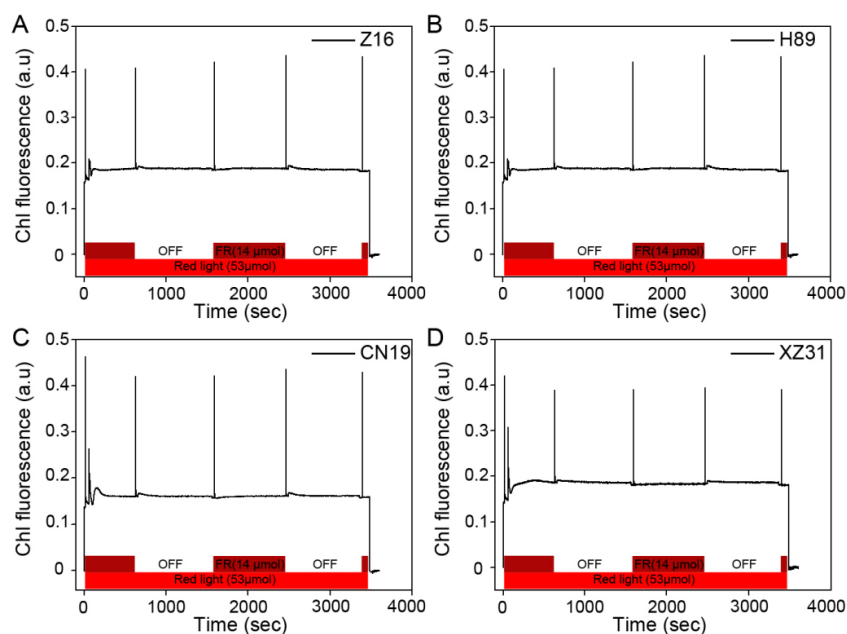

**Figure S3.** Assays of state transitions in Z16, H89, CN19, and XZ31. Pulse amplitude-modulated fluorescence traces after shifts from state 1 to state 2 light and back for Z16 (A), H89 (B), CN19 (C), and XZ31 (D), respectively. The bars at the bottom indicate illumination with red (shown in red) and far-red (dark red) light. Fluorescence is shown in arbitrary units. Z16, H89, CN19, and XZ31 present accessions of *Triticum monococcum* (W2n), *Triticum dicoccum* (W4n), *Triticum aestivum* (W6n), and octaploid Triticale (T8n), respectively.

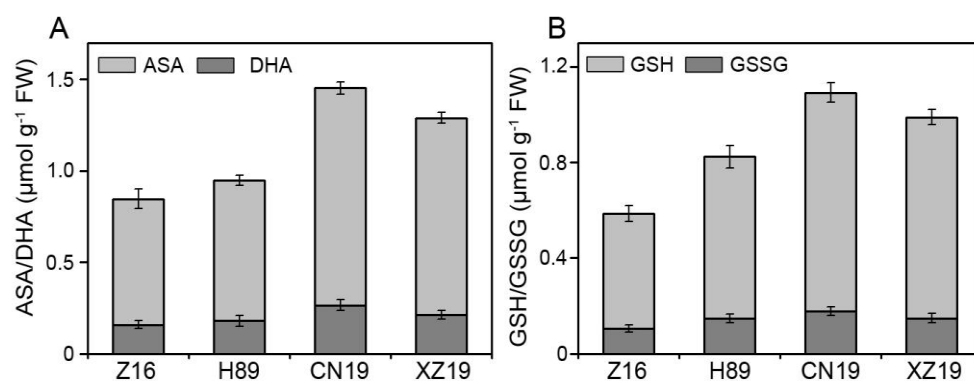

**Figure S4.** The content of ASA/DHA (A) and GSH/GSSG (B) in Z16, H89, CN19, and XZ31. Values are expressed as the means  $\pm$  SD ( $n = 4$ ). Z16, H89, CN19, and XZ31 present accessions of *Triticum monococcum* (W2n), *Triticum dicoccum* (W4n), *Triticum aestivum* (W6n), and octaploid Triticale (T8n), respectively.

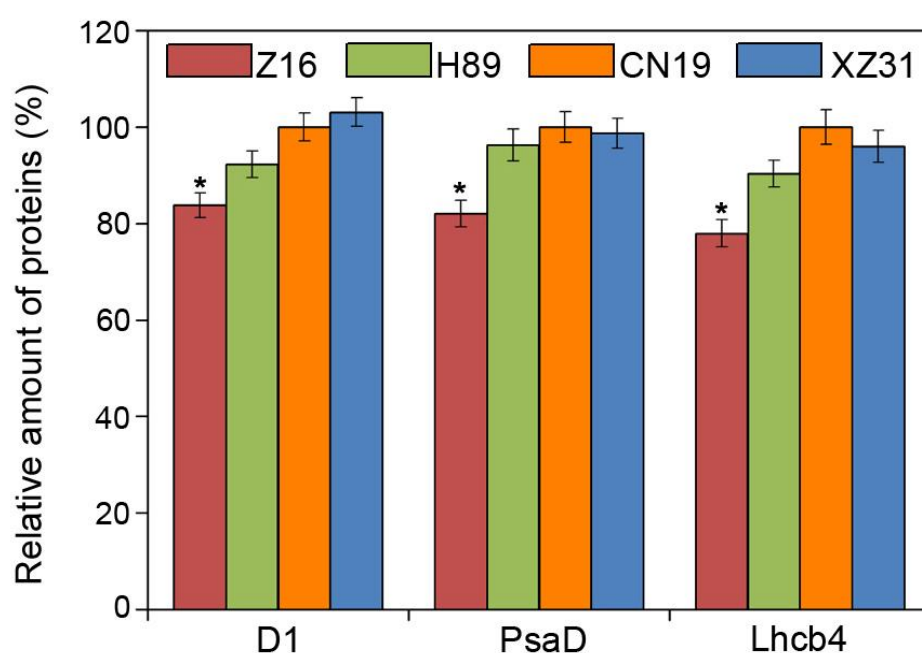

**Figure S5.** Quantification of D1, PsaD, and Lhcb4 proteins in Z16, H89, CN19, and XZ31. Data are presented relative to the amount of respective CN19 (100%). Values are means  $\pm$  SD from four independent biological replicates ( $n = 4$ ). Asterisks indicate statistically significant differences at  $P < 0.05$  level (Duncan's multiplication range test). Z16, accessions of *Triticum monococcum* (W2n); H89, accessions of *Triticum dicoccum* (W4n); CN19, accessions of *Triticum aestivum* (W6n); XZ31, accessions of octaploid Triticale (T8n).

**Table S1.** Results of two-way analysis of variance (ANOVA) of 1000-grain weight and chlorophyll fluorescence, P700, and gas exchange parameters.

| Dependent variable | Pearson Correlation Coefficient | Dependent Variable | Pearson Correlation Coefficient |
|--------------------|---------------------------------|--------------------|---------------------------------|
| Fv/Fm              | 0.597**                         | $\Phi_{ND}$        | 0.384                           |
| $\Phi_{PSII}$      | 0.618**                         | $\Phi_{NA}$        | -0.553*                         |
| NPQ/4              | 0.629**                         | $P_n$              | 0.550*                          |
| qP                 | 0.535*                          | Tr                 | 0.279                           |
| $P_m$              | 0.582*                          | Gs                 | 0.383                           |
| qL                 | -0.725**                        | Ci                 | 0.414                           |
| $\Phi_{PSI}$       | 0.664**                         | Chl                | 0.896**                         |

Numbers represent  $F$  values at 5% level. \*, \*\* indicate statistically significant correlation at  $P < 0.05$  and  $P < 0.01$  levels, respectively. Z16, H89, CN19, and XZ31 present accessions of *Triticum monococcum* (W2n), *Triticum dicoccum* (W4n), *Triticum aestivum* (W6n), and octaploid Triticale (T8n), respectively. Fv/Fm, the maximum efficiency of PSII photochemistry;  $\Phi_{PSII}$ , the quantum yield of PSII electron transport; NPQ, the non-photochemical quenching; qP, the photochemical quenching;  $P_m$ , maximal P700 signal; qL, the fraction of PSII centers that are open;  $\Phi_{PSI}$ , effective quantum yield of PSI;  $\Phi_{ND}$ , quantum yield of non-photochemical energy dissipation in PSI reaction centers due to donor-side limitation;  $\Phi_{NA}$ , quantum yield of non-photochemical energy dissipation of PSI reaction centers due to acceptor side limitation;  $P_n$ , Net photosynthetic rate; Tr, transpiration rate; Gs, stomatal conductance; Ci, intercellular CO<sub>2</sub> concentration; Chl, chlorophyll.
